# Supplementary material for: A corporate approach to enhancing lithium-ion battery safety through flame-retardant electrolyte development
Source: Frontiers journal article supplement (doi:10.3389/fenrg.2024.1508471), 2025-01-20
Supplement: Data_Sheet_1.pdf [file Data_Sheet_1.pdf]

Figure S1. Experimental results obtained from Table 1 and FIG. 1 of USP 7,491,471 B2

(A) Design of experiments and (B)  $dQ/dV$  data of the 1<sup>st</sup> charge curve.

(A)

|       | electrolyte solvents (vol.%) |     |              | salt      | additive |                   |
|-------|------------------------------|-----|--------------|-----------|----------|-------------------|
|       | EC                           | DEC | $\gamma$ -BL |           | FEC      | LiBF <sub>4</sub> |
| No. 1 | 30                           | 70  | -            | 1.3 mol/L | -        | -                 |
| No. 2 | 30                           | 20  | 50           |           | -        | -                 |
| No. 3 | 30                           | 20  | 50           |           | 5 wt.%   | -                 |
| No. 4 | 30                           | 20  | 50           |           | 5 wt.%   | 0.03 mol/L        |

(B)

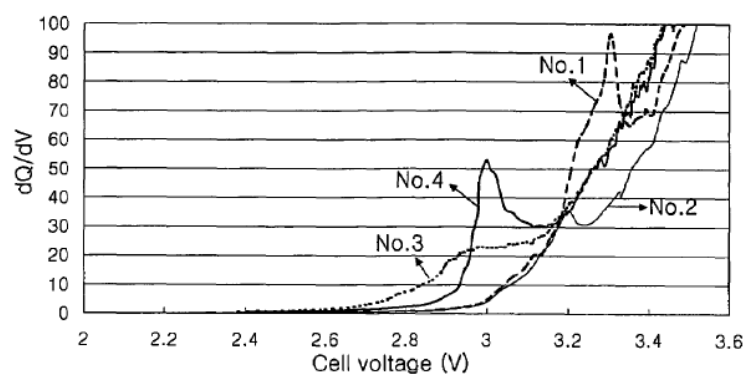

Figure S2. Experimental results obtained from Table 1 and FIG. 2 of USP 7,491,471 B2

(A) Design of experiments and (B)  $dQ/dV$  data of the 1<sup>st</sup> charge curve according to the amount of  $\text{LiBF}_4$  added.

(A)

|        | electrolyte solvents |          | salt            |                 |
|--------|----------------------|----------|-----------------|-----------------|
|        | EC                   | DEC      | $\text{LiPF}_6$ | $\text{LiBF}_4$ |
| No. 3  | 30 vol.%             | 70 vol.% | 1.3 mol/L       | -               |
| No. 20 |                      |          |                 | 0.5 wt.%        |
| No. 21 |                      |          |                 | 1.0 wt.%        |
| No. 22 |                      |          |                 | 2.0 wt.%        |

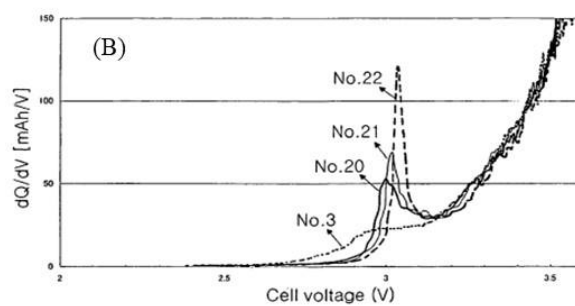

Table S1 from USP 7,491,471 B2

TABLE 1

|        |              | Non-aqueous organic solvent<br>(% by volume) |     |     |    |                        | Electrolyte<br>salt       |                            | Gelling           |                   |
|--------|--------------|----------------------------------------------|-----|-----|----|------------------------|---------------------------|----------------------------|-------------------|-------------------|
|        |              | EC                                           | GBL | DEC | FE | Dielectric<br>constant | 1st<br>salt               | 2nd<br>salt                | compound<br>PEGDA | Ester<br>compound |
| No. 1  | Comp.<br>Ex. | 30                                           | —   | 70  | —  | 26                     | LiPF <sub>6</sub><br>1.3M | —                          | —                 | —                 |
| No. 2  | Comp.<br>Ex. | 30                                           | 50  | 20  | —  | 56                     | LiPF <sub>6</sub><br>1.3M | —                          | —                 | —                 |
| No. 3  | Comp.<br>Ex. | 30                                           | 50  | 20  | —  | 62                     | LiPF <sub>6</sub><br>1.3M | —                          | —                 | FEC<br>5 wt. %    |
| No. 4  | Example      | 30                                           | 50  | 20  | —  | 62                     | LiPF <sub>6</sub><br>1.3M | LiBF <sub>4</sub><br>0.03M | —                 | FEC<br>5 wt. %    |
| No. 5  | Example      | 20                                           | 60  | 20  | —  | 60                     | LiPF <sub>6</sub><br>1.3M | LiBF <sub>4</sub><br>0.03M | —                 | FEC<br>5 wt. %    |
| No. 6  | Example      | 10                                           | 70  | 20  | —  | 58                     | LiPF <sub>6</sub><br>1.3M | LiBF <sub>4</sub><br>0.03M | —                 | FEC<br>5 wt. %    |
| No. 7  | Example      | —                                            | 80  | 20  | —  | 56                     | LiPF <sub>6</sub><br>1.3M | LiBF <sub>4</sub><br>0.03M | —                 | FEC<br>5 wt. %    |
| No. 8  | Example      | —                                            | 90  | 10  | —  | 62                     | LiPF <sub>6</sub><br>1.3M | LiBF <sub>4</sub><br>0.03M | —                 | FEC<br>5 wt. %    |
| No. 9  | Example      | —                                            | 100 | 0   | —  | 68                     | LiPF <sub>6</sub><br>1.3M | LiBF <sub>4</sub><br>0.03M | —                 | FEC<br>5 wt. %    |
| No. 10 | Example      | —                                            | 90  |     | 10 | 62                     | LiPF <sub>6</sub><br>1.3M | LiBF <sub>4</sub><br>0.03M | —                 | FEC<br>5 wt. %    |
| No. 11 | Example      | —                                            | 80  |     | 20 | 56                     | LiPF <sub>6</sub><br>1.3M | LiBF <sub>4</sub><br>0.03M | —                 | FEC<br>5 wt. %    |
| No. 12 | Example      | —                                            | 100 |     |    | 68                     | LiPF <sub>6</sub><br>1.3M | LiBF <sub>4</sub><br>0.03M | 3 wt. %           | FEC<br>5 wt. %    |
| No. 13 | Comp.<br>Ex. | —                                            | 10  | 90  | —  | 14                     | LiPF <sub>6</sub><br>1.3M | LiBF <sub>4</sub><br>0.03M | —                 | FEC<br>5 wt. %    |
| No. 14 | Comp.<br>Ex. | —                                            | —   | 100 | —  | 8                      | LiPF <sub>6</sub><br>1.3M | LiBF <sub>4</sub><br>0.03M | —                 | FEC<br>5 wt. %    |
| No. 15 | Example      | 10                                           | 70  | 20  | —  | 61                     | LiPF <sub>6</sub><br>1.3M | LiBF <sub>4</sub><br>0.03M | —                 | FEC<br>3 wt. %    |
| No. 16 | Example      | 10                                           | 70  | 20  | —  | 64                     | LiPF <sub>6</sub><br>1.3M | LiBF <sub>4</sub><br>0.03M | —                 | FEC<br>10 wt. %   |
| No. 17 | Example      | 10                                           | 70  | 20  | —  | 76                     | LiPF <sub>6</sub><br>1.3M | LiBF <sub>4</sub><br>0.03M | —                 | FEC<br>20 wt. %   |
| No. 18 | Example      | 10                                           | 70  | 20  | —  | 58                     | LiPF <sub>6</sub><br>1.3M | LiBF <sub>4</sub><br>0.01M | —                 | FEC<br>5 wt. %    |
| No. 19 | Example      | 10                                           | 70  | 20  | —  | 58                     | LiPF <sub>6</sub><br>1.3M | LiBF <sub>4</sub><br>0.05  | —                 | FEC<br>5 wt. %    |
| No. 20 | Example      | 10                                           | 70  | 20  | —  | 58                     | LiPF <sub>6</sub><br>1.2M | LiBF <sub>4</sub><br>0.1M  | —                 | FEC<br>5 wt. %    |
| No. 21 | Example      | 10                                           | 70  | 20  | —  | 58                     | LiPF <sub>6</sub><br>0.8M | LiBF <sub>4</sub><br>0.5M  | —                 | FEC<br>5 wt. %    |
| No. 22 | Example      | 10                                           | 70  | 20  | —  | 58                     | LiPF <sub>6</sub><br>0.3M | LiBF <sub>4</sub><br>1M    | —                 | FEC<br>5 wt. %    |
| No. 23 | Comp.<br>Ex. | 10                                           | 70  | 20  | —  | 58                     | LiPF <sub>6</sub><br>1.3M | BETI<br>0.03M              | —                 | FEC<br>5 wt. %    |
| No. 24 | Comp.<br>Ex. | 10                                           | 70  | 20  | —  | 58                     | LiPF <sub>6</sub><br>1.3M | BETI<br>0.05M              | —                 | FEC<br>5 wt. %    |
| No. 25 | Comp.<br>Ex. | 10                                           | 70  | 20  | —  | 58                     | BETI<br>1.3M              | —                          | —                 | FEC<br>5 wt. %    |
| No. 26 | Example      | 10                                           | 70  | 20  | —  | 58                     | BETI<br>1.3M              | LiBF <sub>4</sub><br>0.03M | —                 | FEC<br>5 wt. %    |
| No. 27 | Example      | 30                                           | 50  | 20  | —  | 54                     | LiPF <sub>6</sub><br>1.3M | LiBF <sub>4</sub><br>0.03M | —                 | NEC<br>5 wt. %    |
| No. 28 | Example      | 30                                           | 50  | 20  | —  | 54                     | LiPF <sub>6</sub><br>1.3M | LiBF <sub>4</sub><br>0.03M | —                 | CEC<br>5 wt. %    |

Table S2 from USP 7,491,471 B2

TABLE 2

|        |           | 100th<br>(%) | 2A (charge)     | 2A (discharge) | Thickness<br>rate at a high<br>temperature | Recovery rate<br>at a high<br>temperature |
|--------|-----------|--------------|-----------------|----------------|--------------------------------------------|-------------------------------------------|
| No. 1  | Comp. Ex. | 95           | Explosion       | Explosion      | 5%                                         | 89%                                       |
| No. 2  | Comp. Ex. | 42           | No<br>explosion | Explosion      | 30%                                        | 65%                                       |
| No. 3  | Comp. Ex. | 95           | No<br>Explosion | Explosion      | 50%                                        | 32%                                       |
| No. 4  | Example   | 94           | No<br>Explosion | No Explosion   | 3%                                         | 95%                                       |
| No. 5  | Example   | 94           | No<br>Explosion | No Explosion   | 3%                                         | 95%                                       |
| No. 6  | Example   | 94           | No<br>Explosion | No Explosion   | 3%                                         | 95%                                       |
| No. 7  | Example   | 94           | No<br>Explosion | No Explosion   | 3%                                         | 95%                                       |
| No. 8  | Example   | 93           | No<br>Explosion | No Explosion   | 3%                                         | 95%                                       |
| No. 9  | Example   | 90           | No<br>Explosion | No Explosion   | 3%                                         | 95%                                       |
| No. 10 | Example   | 93           | No<br>Explosion | No Explosion   | 3%                                         | 95%                                       |
| No. 11 | Example   | 93           | No<br>Explosion | No Explosion   | 3%                                         | 95%                                       |
| No. 12 | Example   | 95           | No<br>Explosion | No Explosion   | 1%                                         | 98%                                       |
| No. 13 | Comp. Ex. | 72           | Explosion       | Explosion      | 20%                                        | 80%                                       |
| No. 14 | Comp. EX. | 55           | Explosion       | Explosion      | 40%                                        | 72%                                       |
| No. 15 | Example   | 94           | No<br>Explosion | No Explosion   | 3%                                         | 95%                                       |
| No. 16 | Example   | 95           | No<br>Explosion | Rupture        | 15%                                        | 84%                                       |
| No. 17 | Example   | 95           | No<br>Explosion | Rupture        | 25%                                        | 75%                                       |
| No. 18 | Example   | 95           | No<br>Explosion | No Explosion   | 3%                                         | 95%                                       |
| No. 19 | Example   | 92           | No<br>Explosion | No Explosion   | 3%                                         | 95%                                       |
| No. 20 | Example   | 90           | No<br>Explosion | No Explosion   | 3%                                         | 95%                                       |
| No. 21 | Example   | 85           | No<br>Explosion | No Explosion   | 3%                                         | 95%                                       |
| No. 22 | Example   | 80           | No<br>Explosion | No Explosion   | 3%                                         | 95%                                       |
| No. 23 | Comp. Ex. | 94           | No<br>Explosion | Explosion      | 50%                                        | 50%                                       |
| No. 24 | Comp. Ex. | 94           | No<br>Explosion | Explosion      | 50%                                        | 50%                                       |
| No. 25 | Comp. Ex. | 90           | No<br>Explosion | Explosion      | 50%                                        | 32%                                       |
| No. 26 | Example   | 89           | No<br>Explosion | No Explosion   | 3%                                         | 95%                                       |

Table S3 from USP 7,223,500 B2

TABLE 1

|                          | Additives      | Initial<br>Thickness<br>(mm) | Thickness<br>after high<br>temperature<br>storage<br>(mm) | Thickness<br>variation<br>ratio |
|--------------------------|----------------|------------------------------|-----------------------------------------------------------|---------------------------------|
| Example 1                | FEC (2 wt %)   | 4.15                         | 4.82                                                      | 116%                            |
| Example 2                | FEC (2 wt %)   | 4.15                         | 4.45                                                      | 107%                            |
|                          | VS (0.25 wt %) |                              |                                                           |                                 |
| Example 3                | FEC (1 wt %)   | 4.15                         | 4.29                                                      | 103%                            |
|                          | VS (0.25 wt %) |                              |                                                           |                                 |
| Example 6                | FEC (5 wt %)   | 4.15                         | 12.81                                                     | 309%                            |
| Example 7                | FEC (5 wt %)   | 4.15                         | 5.22                                                      | 126%                            |
|                          | VS (0.75 wt %) |                              |                                                           |                                 |
| Comparative<br>Example 3 | No additive    | 4.15                         | 5.25                                                      | 127%                            |
| Comparative<br>Example 4 | VC (5 wt %)    | 4.15                         | 13.45                                                     | 324%                            |

Note:

FEC: fluoroethylene carbonate

VS: vinyl sulfone

VC: vinylene carbonate

Table S4. Specifications of LIB components

|           | Material     | Specification           |
|-----------|--------------|-------------------------|
| Anode     | Graphite     | 2.5×2.5 cm <sup>2</sup> |
| Cathode   | NCM 622      | 2.0×2.0 cm <sup>2</sup> |
| Reference | Graphite     | 0.5×2.5 cm <sup>2</sup> |
| Separator | Polyethylene | 3.0×3.0 cm <sup>2</sup> |
